# Supplementary material for: A mechanical signal transmitted by the flagellum controls signalling in Bacillus subtilis
Source: PubMed Central journal article supplement (PMC3963450; doi:10.1111/mmi.12342), 2013-08-14
Supplement: mmi0090-0006-sd5.pdf [file mmi0090-0006-sd5.pdf]

1 **Supplemental Material**

2 **A mechanical signal transmitted by the flagellum controls signalling in *Bacillus subtilis***

3 **Lynne S. Cairns<sup>1</sup>, Victoria L. Marlow<sup>1</sup>, Emma Bissett<sup>1</sup>, Adam Ostrowski<sup>1</sup>, and Nicola R. Stanley-**  
4 **Wall<sup>1</sup>**

5

6 <sup>1</sup> Division of Molecular Microbiology, College of Life Sciences, University of Dundee, Dundee, UK DD1  
7 5EH

8

9 \*Running Title: Flagella mediated signal transduction

10

11 To whom correspondence should be addressed:

12 Nicola R. Stanley-Wall

13 Division of Molecular Microbiology, College of Life Sciences, University of Dundee, Dundee DD1 5EH.

14 Email: [n.r.stanleywall@dundee.ac.uk](mailto:n.r.stanleywall@dundee.ac.uk) Tel: +44(0)1382 385136; Fax: +44(0)1382 388216;

15

16 Keywords: *Bacillus subtilis*, motility, rotation, flagellum, signal transduction, response regulator

17

18

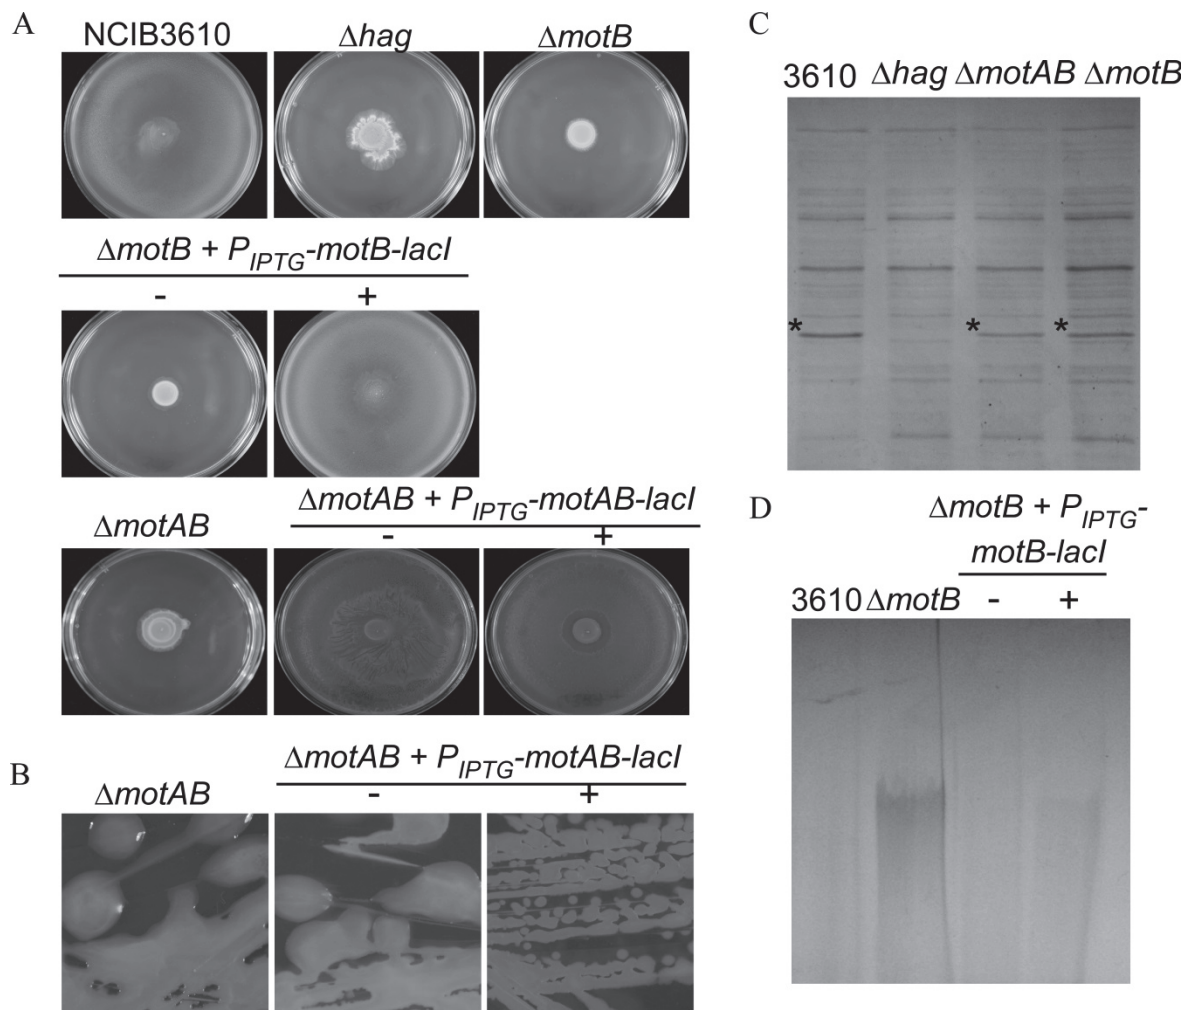

19

20 **Figure S1 The  $\Delta motB$  strain can be complemented by  $motB$ , but not by  $motB D^{24}A$ . (A)**

21 Photographs of swarm expansion assay plates taken after 6 hours incubation at 37 °C. Strains shown  
 22 are NCIB3610 (wild-type),  $\Delta hag$  (DS1677),  $\Delta motB$  (NRS3494),  $\Delta motB + P_{IPTG}-motB-lacI$  (NRS3775)

23 grown in the absence and presence of 50  $\mu$ M IPTG,  $\Delta motAB$  (NRS3744) and  $\Delta motAB + P_{IPTG}-motAB-$

24  $lacI$  (NRS4387) grown in the absence and presence of 50  $\mu$ M IPTG **(B)** Colony morphology of

25  $\Delta motAB$  (NRS3744) and  $\Delta motAB + P_{IPTG}-motAB-lacI$  (NRS 4387) grown overnight at 37°C on LB agar

26 in the absence and presence of 1 mM IPTG. **(C)** Coomassie stained SDS-PAGE analysis examining Hag

27 polymerisation for strains, NCIB3610 (3610),  $\Delta hag$  (NRS2253),  $\Delta motAB$  (NRS3744) and  $\Delta motB$

28 (NRS3494). The Hag protein (as identified by mass spectrometry analysis) is indicated by the

29 presence of an asterix. **(D)** SDS-PAGE of  $\gamma$ -PGA collected from cultures of NCIB3610,  $\Delta motB$

30 (NRS3494) and  $\Delta motB + P_{IPTG}-motB-lacI$  (NRS3775) grown to the onset of stationary phase.

31

Flagella mediated signal transduction

A

```

E.   MKNQAHPIIVVKRRKAKSHGAAHGSWKIAYADDFMTAMMAFFLVMWLISISSPKELIQIAE
B.   -----MARKKKKKHEDEHVDESWLVPYADDILTLLLLALFIVLYASSSIDAAKFQMLSK
      ..*:* * :.. ..** :***:* * :*:*:*: * . : : :
E.   YFRTPLATAVTGGDRISNSESPIPGGGD--DYTQSQG-EVNKQPNIEELKKRMEQSRLRK
B.   SF----NEVFTGGTGVLDYSSVTPPENESDGIDEVKKEKEEKEKNKKEKEKAADQEELN
      *      ..*** : : . * * : : : :*: * : * : * : * :
E.   LRGDLDQLIESDPKLRALRPHLKIDLVQEGRLRIQIIDSQNRPMFRTGSADVEPYMRDILR
B.   VKSQVEKFIKD---KKLEHQLETKMTSEGLLITIKDS---IFFDSGKATIRKEDVPLAK
      : : : : : * : * : * : * : * : * : * : * : * :
E.   AIAP-VLNGIPNRISLSGHTDDFPYASGEKGYSNWELSADRANASRRELMVGGLDSGKVL
B.   EISNLLVINPPRNIISGHTDNMPIKNSF-QSNWHLSVMRAVNFMGLLIENPKLDAKVF
      * : : * . * : * * * : * . * * * . * * * * : : . * * :
E.   RVVGMAATMRL--SDRGPDDAVNRRISLLVLNKQAEQAILHENAESQNEPVSALEKPEVA
B.   SAKGYGEYKPVASNKTAEGRSKNRRVEVLILPRGAAET-----NEK-----
      . * . : . . : * * : * * : * : * : * *
E.   PQVSVPTMPSAEPR
B.   -----
  
```

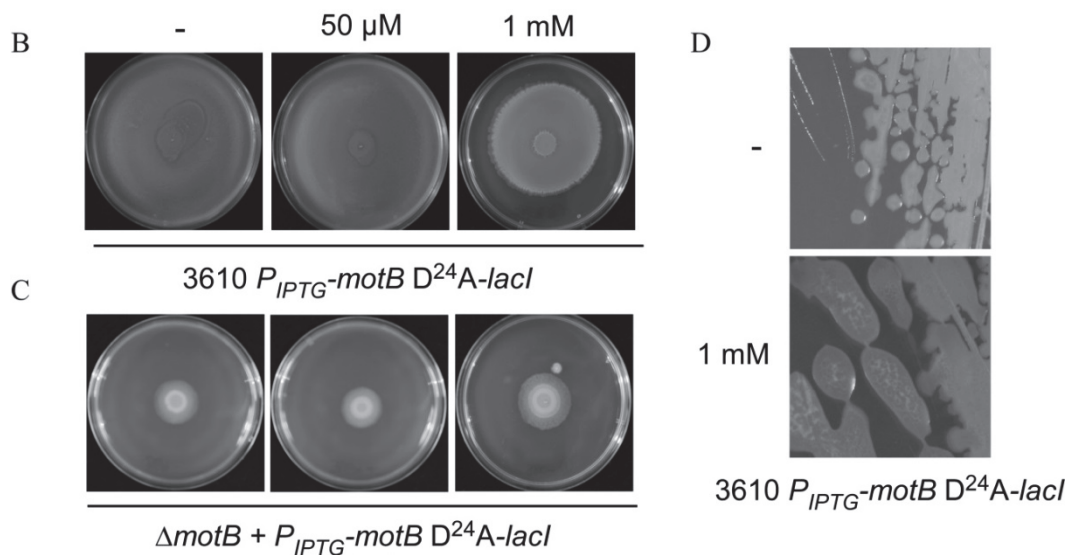

32

33 **Figure S2 Characterisation of the *motB* D<sup>24</sup>A mutation. (A)** Sequence alignment for the MotB  
 34 proteins from *E. coli* (E.) and *B. subtilis* (B.) The conserved aspartic acid residue is shown in bold and  
 35 underlined text. (B) and (C) Photographs of swarm expansion assay plates taken after 6 hours  
 36 incubation at 37 °C. Strains shown are: (B)  $\Delta motB + P_{IPTG}\text{-}motB D^{24}A\text{-}lacI$  (NRS3867) grown in the  
 37 absence and presence of 50  $\mu M$  or 1mM IPTG and (C)  $P_{IPTG}\text{-}motB D^{24}A\text{-}lacI$  (NRS3868) grown in the  
 38 absence and presence of 50  $\mu M$  or 1mM IPTG. (D) Colony morphology of  $P_{IPTG}\text{-}motB\text{-}D^{24}A\text{-}lacI$   
 39 (NRS3868) grown on LB agar in the absence and presence of 1 mM IPTG.

40

41

42  
43  
44

A

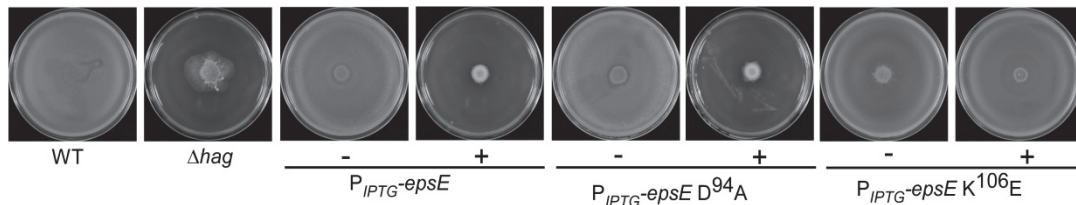

B

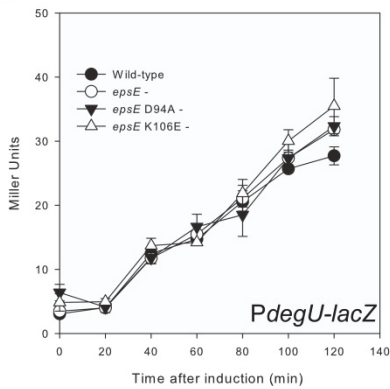

C

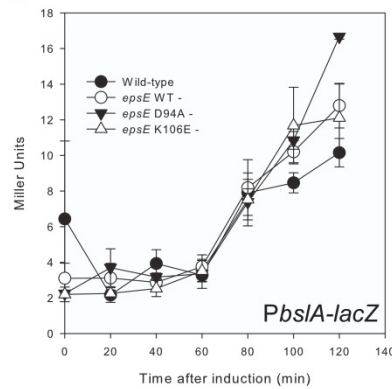

D

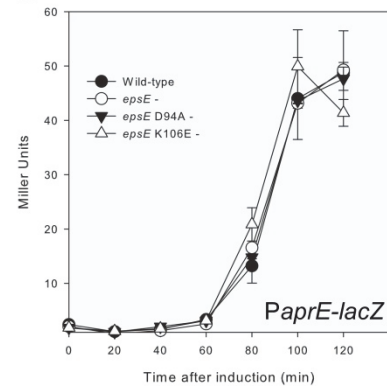

45

46 **Figure S3 The clutch function of EpsE stops flagellar motility and results in  $\gamma$ -PGA biosynthesis. (A)**  
 47 **Swarm expansion assay for the wild-type (WT, NCIB3610),  $\Delta hag$  (DS1677) and  $P_{IPTG-epsE}$  (NRS4085),**  
 48  **$P_{IPTG-epsE} D^{94}A$  (NRS4388) and  $P_{IPTG-epsE} K^{106}E$  (NRS4389) in the absence and presence of 1mM IPTG.**  
 49 **Photographs of plates were taken after 5 hours incubation at 37 °C. (B), (C) and (D)  $\beta$ -galactosidase**  
 50 **assays of strains carrying the  $P_{degU-lacZ}$ ,  $P_{bsIA-lacZ}$  or  $P_{aprE-lacZ}$  transcriptional reporter fusions,**  
 51 **respectively. Data shown are negative controls grown in the absence of IPTG (see Figure 5). Cells**  
 52 **were grown to 0.5  $OD_{600}$ . Strains shown are (A) WT (wild-type NRS4351),  $epsE^-$  + ( $P_{IPTG-epsE-lacI}$**   
 53 **(NRS4374)),  $epsE D^{94}A^-$  + ( $P_{IPTG-epsE} D^{94}A-lacI$  (NRS4392)) and  $epsE K^{106}E^-$  ( $P_{IPTG-epsE} K^{106}E-lacI$**   
 54 **(NRS4394)). (B) wild-type (NRS2052),  $P_{IPTG-epsE}$  (NRS4405),  $P_{IPTG-epsE} D^{94}A$  (NRS4406) and  $P_{IPTG-epsE} K^{106}E$**   
 55 **(NRS4407). (C) wild-type (NRS1561),  $P_{IPTG-epsE}$  (NRS4345),  $P_{IPTG-epsE} D^{94}A$  (NRS4393) and  $P_{IPTG-epsE} K^{106}E$**   
 56 **(NRS4395). Data shown in parts (B), (C) and (D) are plotted as the average of at least 3**  
 57 **independent replicates. Error bars represent standard error of the mean.**

58

59

60

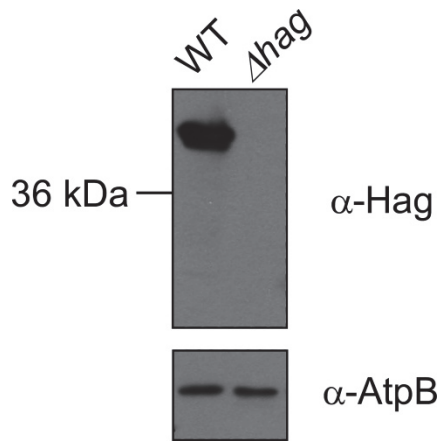

61

62 **Figure S4 The Hag antibody is highly specific.** Western blot of cellular protein fractions collected  
63 from WT (wild-type, NCIB3610) and  $\Delta$ hag strain (DS1677) probed with anti-Hag and anti-AtpB as a  
64 loading control.

65

66

67 **Movie S1 Live cell microscopy of motile *Bacillus subtilis*.** Movie of the *PdegU-lacZ* strain (NRS451)  
68 grown in the absence of antibodies captured 5 minutes after the start of the time-course shown in  
69 Fig. 7B. Movies were acquired using phase contrast, 40 X objective with the Zen high speed digital  
70 recorder (Zeiss) and are shown at 5 frames per second. Movie files were created with QuickTime  
71 Player v10.1. A static image from the data set is shown in Figure 7A.

72

73

74 **Movie S2 Tangling of flagella with a Hag antibody.** Movie of the *PdegU-lacZ* strain (NRS451)  
75 captured 5 minutes after the addition of anti-Hag antibody to the culture. Movies were acquired  
76 using phase contrast, 40 X objective with the Zen high speed digital recorder (Zeiss) and are shown  
77 at 5 frames per second. Movie files were created with QuickTime Player v10.1. A static image from  
78 the data set is shown in Figure 7A.

79

80 **Movie S3 Live cell microscopy of motile *Bacillus subtilis*.** Movie of the *PdegU-lacZ* strain (NRS451)  
81 grown in the absence of antibodies captured 30 minutes after the start of the time-course shown in  
82 Fig. 7B. Movies were acquired using phase contrast, 40 X objective with the Zen high speed digital  
83 recorder (Zeiss) and are shown at 5 frames per second. Movie files were created with QuickTime  
84 Player v10.1.

85

86 **Movie S4 Live cell microscopy of motile *Bacillus subtilis* grown with pre-immune sera.** Movie of the  
87 *PdegU-lacZ* strain (NRS451) captured 30 minutes after the addition of pre-immune sera 1 to the  
88 culture. Movies were acquired using phase contrast, 40 X objective with the Zen high speed digital  
89 recorder (Zeiss) and are shown at 5 frames per second. Movie files were created with QuickTime  
90 Player v10.1.

91

92

93

94 **Supplemental Experimental Procedures.**

95 **Western Blot.**

96 Cellular proteins were extracted as for whole cell analysis of Hag. 10 µg of cellular proteins were  
97 separated by SDS-PAGE prior to transfer onto PVDF membrane (Millipore) by electroblotting.  
98 Antibodies raised against Hag (a kind gift from Prof. Kürsad Turgay) were used at 1:40,000, anti-AtpB  
99 (Abcam) was used at 1:10,000 and goat anti-rabbit or goat anti-mouse (both from Pierce) HRP-  
100 conjugated secondary antibodies were used at 1:5,000.

101 **Plasmid Construction.**

102 **Construction of plasmid pNW680.** Plasmid pNW1045, used to introduce the *motB* coding region  
103 under the control of the IPTG-inducible promoter  $P_{hy-spank}$  at the non-essential *amyE* locus, is a  
104 derivative of pDR111 (Britton *et al.*, 2002). The coding region of *motB* (including ribosome binding  
105 site) was amplified from *B. subtilis* 3610 chromosomal DNA with primers NSW1312 and NSW1313.  
106 The PCR product was digested with HindIII and SphI and cloned into pDR111 cut the same.

107 **Construction of plasmid pNW703.** Plasmid pNW703, used to disrupt the *degU* locus, contains an  
108 internal region of DNA from the *degU* coding region and a kanamycin resistance cassette. To  
109 construct this plasmid the internal region of *degU* was cut from pBL204 (Stanley & Lazazzera, 2005)  
110 using BamHI and EcoRI and ligated into pUC19 (Vieira & Messing, 1982) also digested with BamHI  
111 and EcoRI creating plasmid pNW701. The kanamycin resistance cassette was cut from plasmid  
112 pDG783 (Guerout-Fleury *et al.*, 1995) using SphI and XbaI and ligated into pNW701 also digested  
113 with SphI and XbaI creating pNW703.

114 **Construction of pNW1029.** Plasmid pNW1029, used to introduce the coding region of *motAB* under  
115 the control of the IPTG-inducible promoter  $P_{hy-spank}$  at the non-essential *amyE* locus, is a derivative of  
116 pDR111 (Britton *et al.*, 2002). The coding region of *motAB* (including ribosome binding site) was  
117 amplified from *B. subtilis* 3610 chromosomal DNA with primers NSW969 and NSW1313. The PCR  
118 product was digested with Sall and SphI and cloned into pDR111 cut the same.

119 **Construction of pNW1044.** Plasmid pNW1044, used to introduce the *epsE* coding region under the  
120 control of the IPTG-inducible promoter  $P_{hy-spank}$  at the non-essential *amyE* locus, is a derivative of  
121 pDR111 (Britton *et al.*, 2002). The coding region of *epsE* (including ribosome binding site) was  
122 amplified from *B. subtilis* 3610 chromosomal DNA with primers NSW1602 and NSW1603. The PCR  
123 product was digested with Sall and SphI and cloned into pDR111 cut the same.

124 **Construction of pNW1045.** Plasmid pNW1045, used to introduce a *PdegU-lacZ* transcriptional  
125 reporter fusion at the non-essential *thrC* locus, is a derivative of pDG1663 (Guerout-Fleury *et al.*,  
126 1996). The promoter region of *degU* was amplified from *B. subtilis* NCIB3610 chromosomal DNA with  
127 primers NSW404 and NSW405. The PCR product was digested with EcoRI and HindIII and cloned into  
128 pDG1663 cut the same.

129 **Construction of pNW1047.** Plasmid pNW1047, used to introduce *epsE* D<sup>94</sup>A under control of the  
130 IPTG-inducible promoter P<sub>hy-spank</sub> at the non-essential *amyE* locus, is a derivative of pNW1044. The  
131 D94A mutation was introduced to pNW1044 by site-directed mutagenesis with primers NSW1608  
132 and NSW1609, using PCR amplification conditions calculated according to the Stratagene  
133 Quikchange manual using KOD Hot Start DNA polymerase (Novagen). PCR products were then  
134 treated with DpnI and transformed into competent *E. coli* MC1061 cells. Plasmid pNW1048 for *epsE*  
135 K<sup>106</sup>E was constructed in an identical manner using primers NSW1610 and NSW1611.

136 **Construction of pNW1060.** Plasmid pNW1060, used to introduce *motB* D<sup>24</sup>A under the control of an  
137 IPTG-inducible promoter P<sub>hy-spank</sub> at the non-essential *amyE* locus, is a derivative of pNW680. Briefly,  
138 pNW680 was cut with HindIII and SphI to excise *motB*, which was ligated into pUC19 cut the same to  
139 create plasmid pNW1058. pNW1058 was used as template DNA in a site-directed mutagenesis PCR  
140 reaction (Stratagene™) with primers NSW1011 and NSW1012 to introduce the D<sup>24</sup>A point mutation  
141 and yield plasmid pNW1059. pNW1059 was then cut with HindIII and SphI to excise *motB* D<sup>24</sup>A,  
142 which was ligated into pDR111 to create pNW1060.

143



144 Table S1 Strains used in this study.

| Strain    | Relevant Genotype <sup>a</sup>                                                                                                 | Source <sup>b</sup>             |
|-----------|--------------------------------------------------------------------------------------------------------------------------------|---------------------------------|
| NCIB 3610 | Prototroph                                                                                                                     | B.G.S.C.                        |
| 168       | <i>trpC2</i>                                                                                                                   | B.G.S.C.                        |
| JH642     | <i>trpC2 pheA1</i>                                                                                                             | (Perego & Hoch, 1988)           |
| RL2420    | PY79 pIC333                                                                                                                    | (Kearns <i>et al.</i> , 2004)   |
| DS1677    | 3610 $\Delta$ <i>hag</i>                                                                                                       | Kind gift D. Kearns             |
| NRS1136   | JH642 <i>degS::cml</i>                                                                                                         | (Verhamme <i>et al.</i> , 2007) |
| NRS1154   | JH642 <i>pgdS::pBL141(cml)</i>                                                                                                 | (Stanley & Lazazzera, 2005)     |
| NRS1314   | 3610 <i>degU::pBL204 (cml)</i>                                                                                                 | (Verhamme <i>et al.</i> , 2007) |
| NRS1325   | 3610 <i>degU::pBL204 (cml) amyE::P<sub>hy-spank</sub><sup>-</sup>degU32-hy-lacI (spc)</i>                                      | (Verhamme <i>et al.</i> , 2007) |
| NRS1433   | 168 <i>pgsB::spc</i>                                                                                                           | (Stanley & Lazazzera, 2005)     |
| NRS1534   | 168 <i>thrC::PaprE-lacZ (mls)</i>                                                                                              | (Verhamme <i>et al.</i> , 2007) |
| NRS1561   | 3610 <i>thrC::PaprE-lacZ (mls)</i>                                                                                             | (Verhamme <i>et al.</i> , 2007) |
| NRS2051   | JH642 <i>thrC::PbslA-lacZ (mls)</i>                                                                                            | (Verhamme <i>et al.</i> , 2009) |
| NRS2052   | 3610 <i>thrC::PbslA-lacZ (mls)</i>                                                                                             | (Verhamme <i>et al.</i> , 2009) |
| NRS3347   | 3610 <i>pgdS::cml</i>                                                                                                          | NRS1154→NCIB3610                |
| NRS3348   | 3610 $\Delta$ <i>motB</i> + <i>pgdS::cml</i>                                                                                   | NRS1154→NRS3494                 |
| NRS3374   | 168 <i>degU::pNW703 (kan)</i>                                                                                                  | pNW703 →168                     |
| NRS3433   | 3610 <i>pgsB::spc</i>                                                                                                          | SPP1 NRS1433 →NCIB3610          |
| NRS3434   | 3610 $\Delta$ <i>motB</i> + <i>pgsB::spc</i>                                                                                   | SPP1 NRS1433 → NRS3494          |
| NRS3494   | 3610 $\Delta$ <i>motB</i>                                                                                                      | pNW654 → NCIB3610               |
| NRS3514   | 168 <i>amyE::P<sub>hy-spank</sub><sup>-</sup>motB-lacI (spc)</i>                                                               | pNW680 → 168                    |
| NRS3744   | 3610 $\Delta$ <i>motAB</i>                                                                                                     | pNW1021→ NCIB3610               |
| NRS3764   | 3610 <i>pgsB::spc</i> + <i>degU::kan</i>                                                                                       | SPP1 NRS3374 →NRS3433           |
| NRS3769   | 168 <i>amyE::P<sub>hy-spank</sub><sup>-</sup>motAB-lacI (spc)</i>                                                              | pNW1029 → 168                   |
| NRS3770   | 3610 <i>pgsB::spc</i> + <i>degU::kan amyE::P<sub>hy-spank</sub><sup>-</sup>degU32-hy-lacI (cml)</i>                            | SPP1 NRS1268 →NRS3764           |
| NRS3775   | 3610 $\Delta$ <i>motB</i> + <i>P<sub>hy-spank</sub><sup>-</sup>motB-lacI (spc)</i>                                             | SPP1 NRS3514 →NRS3494           |
| NRS3866   | 168 <i>P<sub>hy-spank</sub><sup>-</sup>motBD<sup>24</sup>A-lacI (spc)</i>                                                      | pNW1051→168                     |
| NRS3867   | 3610 $\Delta$ <i>motB</i> + <i>amyE::P<sub>hy-spank</sub><sup>-</sup>motBD<sup>24</sup>A-lacI (spc)</i>                        | SPP1 NRS3866 →NRS3494           |
| NRS3868   | 3610 <i>amyE::P<sub>hy-spank</sub><sup>-</sup>motBD<sup>24</sup>A-lacI (spc)</i>                                               | SPP1 NRS3866 →NCIB3610          |
| NRS3870   | 3610 $\Delta$ <i>motB</i> + <i>amyE::P<sub>hy-spank</sub><sup>-</sup>motBD<sup>24</sup>A-lacI (spc) thrC::PaprE-lacZ (mls)</i> | SPP1 NRS1534 →NRS3867           |
| NRS4083   | 168 <i>amyE::P<sub>hy-spank</sub><sup>-</sup>epsE-lacI (spc)</i>                                                               | pNW1044 →168                    |
| NRS4084   | 168 <i>thrC::PdegU-lacZ (mls)</i>                                                                                              | pNW1045 →168                    |
| NRS4085   | 3610 <i>amyE::P<sub>hy-spank</sub><sup>-</sup>epsE-lacI (spc)</i>                                                              | SPP1 NRS4083 →NCIB3610          |
| NRS4093   | 3610 $\Delta$ <i>motAB</i> + <i>thrC::PaprE-lacZ (mls)</i>                                                                     | SPP1 NRS1534 →NRS3744           |
| NRS4345   | 3610 <i>amyE::P<sub>hy-spank</sub><sup>-</sup>epsE-lacI (spc) thrC::PaprE-lacZ (mls)</i>                                       | SPP1 NRS1534 →NRS4085           |
| NRS4351   | 3610 <i>thrC::PdegU-lacZ (mls)</i>                                                                                             | SPP1 NRS4084 →NCIB3610          |
| NRS4353   | 3610 $\Delta$ <i>motB</i> + <i>thrC::PdegU-lacZ (mls)</i>                                                                      | SPP1 NRS4084 →NRS3494           |
| NRS4354   | 3610 $\Delta$ <i>motAB</i> <i>thrC::PdegU-lacZ (mls)</i>                                                                       | SPP1 NRS4084 →NRS3744           |
| NRS4373   | 3610 <i>degU::cml</i> + <i>thrC::PdegU-lacZ (mls)</i>                                                                          | SPP1 NRS4084 →NRS1314           |
| NRS4374   | 3610 <i>amyE::P<sub>hy-spank</sub><sup>-</sup>epsE-lacI (spc) thrC::PdegU-lacZ (mls)</i>                                       | SPP1 NRS4084 →NRS4085           |

Flagella mediated signal transduction

| Strain  | Relevant Genotype <sup>a</sup>                                                                                                 | Source <sup>b</sup>    |
|---------|--------------------------------------------------------------------------------------------------------------------------------|------------------------|
| NRS4385 | 168 <i>amyE::P<sub>hy-spank</sub>-epsE-K<sup>106</sup>E-lacI (spc)</i>                                                         | pNW1048 →168           |
| NRS4386 | 168 <i>amyE::P<sub>hy-spank</sub>-epsE-D<sup>94</sup>A-lacI (spc)</i>                                                          | pNW1047 →168           |
| NRS4387 | 3610 $\Delta$ <i>motAB</i> + <i>amyE::P<sub>hy-spank</sub>-motAB-lacI</i>                                                      | SPP1 NRS3469 →NRS3744  |
| NRS4388 | 3610 <i>amyE::P<sub>hy-spank</sub>-epsE-D<sup>94</sup>A-lacI (spc)</i>                                                         | SPP1 NRS4386 →NCIB3610 |
| NRS4389 | 3610 <i>amyE::P<sub>hy-spank</sub>-epsE-K<sup>106</sup>E-lacI (spc)</i>                                                        | SPP1 NRS4385 →NCIB3610 |
| NRS4392 | 3610 <i>amyE::P<sub>hy-spank</sub>-epsE-D<sup>94</sup>A-lacI (spc)</i> +<br><i>thrC::PdegU-lacZ (mls)</i>                      | SPP1 NRS4084 →NRS4388  |
| NRS4393 | 3610 <i>amyE::P<sub>hy-spank</sub>-epsE-D<sup>94</sup>A-lacI (spc)</i> +<br><i>thrC::PaprE-lacZ (mls)</i>                      | SPP1 NRS1534 →NRS4388  |
| NRS4394 | 3610 <i>amyE::P<sub>hy-spank</sub>-epsE-K106E-lacI (spc)</i> +<br><i>thrC::PdegU-lacZ (mls)</i>                                | SPP1 NRS4084 →NRS4389  |
| NRS4395 | 3610 <i>amyE::P<sub>hy-spank</sub>-epsE-K106E-lacI (spc)</i><br><i>thrC::PaprE-lacZ (mls)</i>                                  | SPP1 NRS1534 →NRS4389  |
| NRS4396 | 3610 $\Delta$ <i>motB</i> + <i>thrC::PdegU-lacZ (mls)</i><br><i>amyE::P<sub>hy-spank</sub>-motB-lacI (spc)</i>                 | SPP1 NRS3514 →NRS4353  |
| NRS4397 | 3610 $\Delta$ <i>motB</i> + <i>thrC::PdegU-lacZ (mls)</i><br><i>amyE::P<sub>hy-spank</sub>-motB-D<sup>24</sup>A-lacI (spc)</i> | SPP1 NRS3866 →NRS4353  |
| NRS4398 | 3610 $\Delta$ <i>motB</i> + <i>degS::cml</i>                                                                                   | SPP1 NRS1136 →NRS3494  |
| NRS4399 | 3610 <i>amyE::P<sub>hy-spank</sub>-epsE-lacI (spc)</i> +<br><i>thrC::PaprE-lacZ (mls)</i>                                      | SPP1 NRS1136 →NRS4345  |
| NRS4400 | 3610 <i>amyE::P<sub>hy-spank</sub>-epsE-D<sup>94</sup>A-lacI (spc)</i> +<br><i>thrC::PaprE-lacZ (mls)</i>                      | SPP1 NRS1136 →NRS4393  |
| NRS4401 | 3610 <i>amyE::P<sub>hy-spank</sub>-epsE-K106E-lacI (spc)</i> +<br><i>thrC::PdegU-lacZ (mls)</i>                                | SPP1 NRS1136 →NRS4395  |
| NRS4405 | 3610 <i>amyE::P<sub>hy-spank</sub>-epsE-lacI (spc)</i> +<br><i>thrC::PbslA-lacZ (mls)</i>                                      | SPP12051→NRS4345       |
| NRS4406 | 3610 <i>amyE::P<sub>hy-spank</sub>-epsE-D<sup>94</sup>A-lacI (spc)</i> +<br><i>thrC::PbslA-lacZ (mls)</i>                      | SPP12051→NRS4393       |
| NRS4407 | 3610 <i>amyE::P<sub>hy-spank</sub>-epsE-K106E-lacI (spc)</i> +<br><i>thrC::PbslA-lacZ (mls)</i>                                | SPP12051→NRS4395       |

145 <sup>a</sup> Drug resistance cassettes are indicated as follows: *kan*, kanamycin resistance; *mls*,  
146 lincomycin/erythromycin resistance; *cml*, chloramphenicol resistance and *spc*, spectinomycin  
147 resistance.

148 <sup>b</sup> The direction of strain construction is indicated with DNA or phage (SPP1) (→) recipient strain.  
149 B.S.G.C. is the *Bacillus* genetic stock centre.

150

151 **Table S2 Plasmids used in this study.**

| Plasmid        | Relevant Genotype <sup>a</sup>                                                   | Source                                |
|----------------|----------------------------------------------------------------------------------|---------------------------------------|
| <b>pDR111</b>  | <i>amyE</i> integration plasmid ( <i>spc</i> )                                   | (Britton <i>et al.</i> , 2002)        |
| <b>pMAD</b>    | In-frame markerless deletion plasmid                                             | (Arnaud <i>et al.</i> , 2004)         |
| <b>pDG1663</b> | <i>lacZ</i> reporter fusion plasmid, <i>thrC</i> integration                     | (Guerout-Fleury <i>et al.</i> , 1996) |
| <b>pUC19</b>   | Cloning plasmid                                                                  | (Vieira & Messing, 1982)              |
| <b>pBL204</b>  | pUC19 containing a <i>cml</i> resistance cassette                                | (Stanley & Lazazzera, 2005)           |
| <b>pNW651</b>  | Region upstream of <i>motB</i> in pUC19                                          | This study                            |
| <b>pNW652</b>  | Region downstream of <i>motB</i> in pUC19                                        | This study                            |
| <b>pNW653</b>  | $\Delta$ <i>motB</i> in pUC19                                                    | This study                            |
| <b>pNW654</b>  | $\Delta$ <i>motB</i> in pMAD                                                     | This study                            |
| <b>pNW680</b>  | <i>motB</i> in pDR111                                                            | This study                            |
| <b>pNW701</b>  | pUC19 containing internal region of <i>degU</i>                                  | This study                            |
| <b>pNW703</b>  | Kanamycin resistance cassette in an internal region of <i>degU</i> coding region | This study                            |
| <b>pNW1019</b> | $\Delta$ <i>motAB</i> in pUC19                                                   | This study                            |
| <b>pNW1021</b> | $\Delta$ <i>motAB</i> in pMAD                                                    | This study                            |
| <b>pNW1029</b> | <i>motAB</i> in pDR111                                                           | This study                            |
| <b>pNW1044</b> | <i>epsE</i> in pDR111                                                            | This study                            |
| <b>pNW1045</b> | <i>PdegU</i> in pDG1663                                                          | This study                            |
| <b>pNW1047</b> | <i>epsE</i> D <sup>94</sup> A in pDR111                                          | This study                            |
| <b>pNW1048</b> | <i>epsE</i> K <sup>106</sup> E in pDR111                                         | This study                            |
| <b>pNW1058</b> | <i>motB</i> in pUC19                                                             | This study                            |
| <b>pNW1059</b> | <i>motB</i> D <sup>24</sup> A in pUC19                                           | This study                            |
| <b>pNW1060</b> | <i>motB</i> D <sup>24</sup> A in pDR111                                          | This study                            |

152 <sup>a</sup> Drug resistance cassettes are indicated as follows: *cml*, chloramphenicol resistance; *kan*, kanamycin  
153 resistance, and *spc*, spectinomycin resistance.

154

155

156 Table S3 Primers used in this study.

| Primer  | Target          | Sequence <sup>a</sup>                      | Position <sup>b</sup> |
|---------|-----------------|--------------------------------------------|-----------------------|
| NSW404  | <i>degU</i>     | GCATGAATTCGGCCTGATTCCAACCTTTAA             | -487→-468             |
| NSW405  | <i>degU</i>     | GCATAAGCTTCTGATGGTCGTCGATAAT               | +26→+39               |
| NSW874  | <i>motB</i>     | GTACGGATCCATTGAGGATGTAGATGATGC             | -480→-460             |
| NSW875  | <i>motB</i>     | ATGCTCTAGAGTACAGCACAATAAACAATGC            | +77→+98               |
| NSW876  | <i>motB</i>     | GCATTCTAGAGTTGAAGTTCTCATTTTGCCG            | +700→+721             |
| NSW877  | <i>motB</i>     | GCATGTCGACCATCGCTCCAACATACACC              | +1500→+1519           |
| NSW965  | <i>motA</i>     | GCTAGGATCCTTGAGGATGAAATGACCGATCTGC         | -479→-156             |
| NSW966  | <i>motA</i>     | GCTATCAGACGAAGTTTTATCCATAGTTTTACC          | -10→+16               |
| NSW969  | <i>motA</i>     | GCTAGTGCAGACAGACAAGCTAGTAAAAAAGGATTTGG     | -66→-9                |
| NSW1011 | <i>motB</i>     | TCATGGCTCGTTCCTTACGCCGCATCCTTACTCTTCTCTCTG | +49→+91               |
| NSW1012 | <i>motB</i>     | CAGGAGAAGAGTAAGGATGGCGGCGTAAGGAACGAGCCATGA | +49→+91               |
| NSW1312 | <i>motB</i>     | GCATAAGCTTGCAGAACAAGGAGAGGCGCAAAT          | -30→-6                |
| NSW1313 | <i>motB</i>     | GCATGCATGCCTATTTTTCATTTGTTCCGCTGCGC        | +880→+904             |
| NSW1474 | <i>pgsB</i>     | CTGTAAACCCAGATTATCAAATC                    | +331→+354             |
| NSW1475 | <i>pgsB</i>     | CTGCGCGGCAGTTCATGATGAT                     | +889→+868             |
| NSW1602 | <i>epsE</i>     | AGGAGGTCGACAAAGGAGAAAAGCGTATGAACTCAG       | -16→-1                |
| NSW1603 | <i>epsE</i>     | CTCCTGCATGCTGGCTGCTATTCATGCTTGACAAG        | +820→+843             |
| NSW1604 | <i>pgdS</i>     | GGAGACGGCCAAATGGTTC                        | +370→+388             |
| NSW1605 | <i>pgdS</i>     | GCAAGCCGGTCAGAAAAAG                        | +778→+796             |
| NSW1608 | <i>epsE</i>     | CGCACGTCAGGCCGGAGATGACCTTTTCG              | +270→+298             |
| NSW1609 | <i>epsE</i>     | CGAAAGGTCATCTCCGGCCTGACGTGCG               | +270→+298             |
| NSW1610 | <i>epsE</i>     | CCGCGCCGTCTGGAAGAGCAGGTCGCGTTTTTA          | +301→+333             |
| NSW1611 | <i>epsE</i>     | TAAAAACGCGACCTTCTCTTCCAGACGGCGCGG          | +301→+333             |
| DEN5    | <i>16S rRNA</i> | TCACGRCACGAGCTGACGAC                       |                       |
| DEN7    | <i>16S rRNA</i> | ACTCCTACGGGAGGCAGC                         |                       |

157 <sup>a</sup> Underlined sequences indicate endonuclease restriction cut sites. Bold sequences represent base  
 158 pairs mutated by site-directed mutagenesis.

159 <sup>b</sup> Position of primer is indicated in relation to the translational start site (noted as +1) of the named  
 160 gene.

161

162

163 **Supplemental References**

164

165 Arnaud, M., Chastanet, A. & Debarbouille, M., (2004) New vector for efficient allelic replacement in  
166 naturally nontransformable, low-GC-content, gram-positive bacteria. *Appl Environ Microbiol*  
167 **70**: 6887-6891.

168 Britton, R. A., Eichenberger, P., Gonzalez-Pastor, J. E., Fawcett, P., Monson, R., Losick, R. &  
169 Grossman, A. D., (2002) Genome-wide analysis of the stationary-phase sigma factor (Sigma-  
170 H) regulon of *Bacillus subtilis*. *Journal of Bacteriology* **184**: 4881-4890.

171 Guerout-Fleury, A. M., Frandsen, N. & Stragier, P., (1996) Plasmids for ectopic integration in *Bacillus*  
172 *subtilis*. *Gene* **180**: 57-61.

173 Guerout-Fleury, A. M., Shazand, K., Frandsen, N. & Stragier, P., (1995) Antibiotic-resistance cassettes  
174 for *Bacillus subtilis*. *Gene* **167**: 335-336.

175 Kearns, D. B., Chu, F., Rudner, R. & Losick, R., (2004) Genes governing swarming in *Bacillus subtilis*  
176 and evidence for a phase variation mechanism controlling surface motility. *Mol Microbiol* **52**:  
177 357-369.

178 Perego, M. & Hoch, J. A., (1988) Sequence analysis and regulation of the *hpr* locus, a regulatory gene  
179 for protease production and sporulation in *Bacillus subtilis*. *J Bacteriol* **170**: 2560-2567.

180 Stanley, N. R. & Lazazzera, B. A., (2005) Defining the genetic differences between wild and domestic  
181 strains of *Bacillus subtilis* that affect poly-gamma-dl-glutamic acid production and biofilm  
182 formation. *Mol Microbiol* **57**: 1143-1158.

183 Verhamme, D. T., Kiley, T. B. & Stanley-Wall, N. R., (2007) DegU co-ordinates multicellular behaviour  
184 exhibited by *Bacillus subtilis*. *Mol Microbiol* **65**: 554-568.

185 Verhamme, D. T., Murray, E. J. & Stanley-Wall, N. R., (2009) DegU and Spo0A jointly control  
186 transcription of two loci required for complex colony development by *Bacillus subtilis*. *J*  
187 *Bacteriol* **191**: 100-108.

188 Vieira, J. & Messing, J., (1982) The pUC plasmids, an M13mp7-derived system for insertion  
189 mutagenesis and sequencing with synthetic universal primers. *Gene* **19**: 259-268.

190

191
